# Supplementary material
Source: Research Square preprint supplement (doi:10.21203/rs.3.rs-9737805/v1)
Supplement: Supplementary file 1 [file d3a39b2a589f8ec2c327434b.docx]

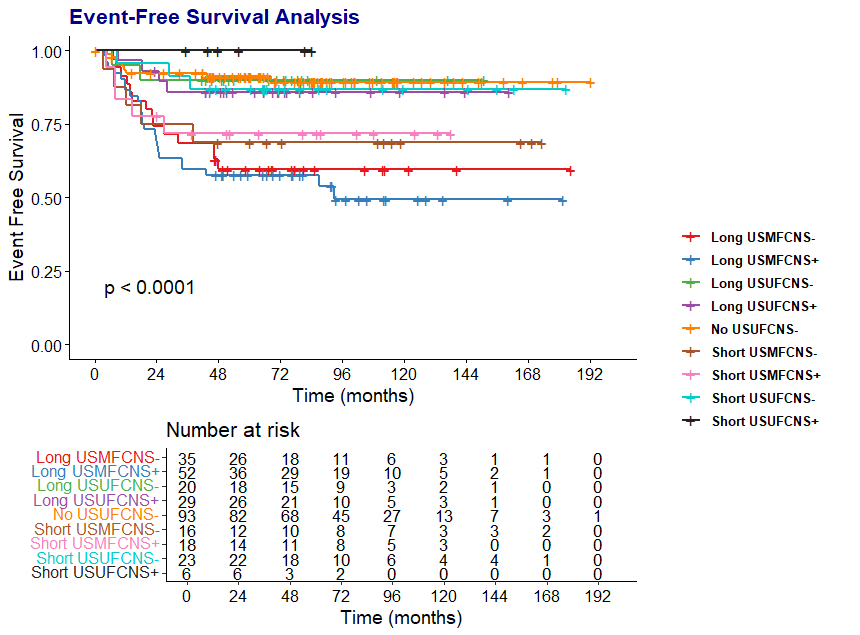


USUF: unisystem unifocal, USMF: unisystem multifocal, CNS-: non CNS risk , CNS+: CNS risk group, No: No induction

Long : Long induction Short short induction No: no induction

**Supplement fig.1 EFS per Induction duration according to stratification**


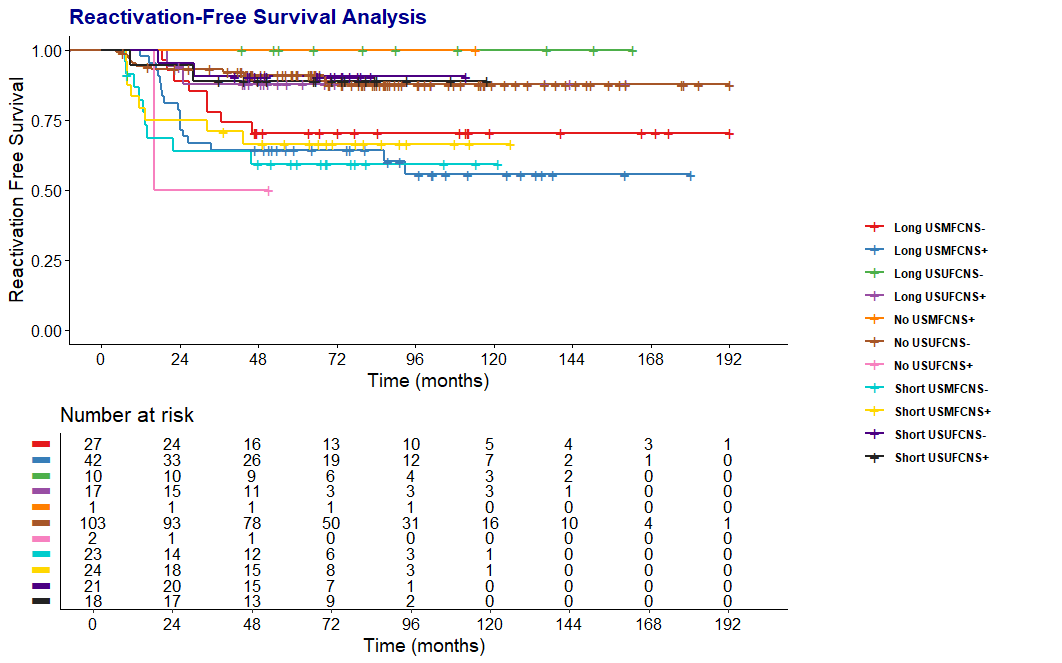
Long : long maintenance Short short maintenance

**Supplement Fig. 2 RFS per maintenance duration according to stratification.**
